# Supplementary material for: Influence of Mo modification on coaromatization coupling methanol with n-hexane over [Zn,Mo]/HZSM-5 catalysts
Source: Royal Society of Chemistry journal article supplement (doi:10.1039/d3re00133d), 2023-01-01
Supplement: d3re00133d1.pdf [file d3re00133d1.pdf]

**Influence of Mo modification on coaromatization of methanol and n-hexane over [ZnMo]/HZSM-5 catalyst**

Bing Zhu, Haibo Li, Xue Wang, Subing Fan\*, Junmin Lv, Tian-sheng Zhao\*

<sup>a</sup> State Key Laboratory of High-efficiency Utilization of Coal and Green Chemical Engineering, School of Chemistry and Chemical Engineering, Ningxia University, Yinchuan 750021, China

Corresponding author: Email: [fansb@nxu.edu.cn](mailto:fansb@nxu.edu.cn)(Subing Fan); [zhaots@nxu.edu.cn](mailto:zhaots@nxu.edu.cn)(Tian-sheng Zhao)

**Table S1** XRD lattice constants for synthesized [Zn,Mo]/HZ-5

| Sample      | Cell parameters |       |       |          |         |          |
|-------------|-----------------|-------|-------|----------|---------|----------|
|             | a               | b     | c     | $\alpha$ | $\beta$ | $\gamma$ |
| HZ-5        | 20.10           | 19.92 | 13.39 | 90       | 90      | 90       |
| Zn/HZ-5     | 20.14           | 19.95 | 13.43 | 90       | 90      | 90       |
| Zn-1Mo/HZ-5 | 20.15           | 19.94 | 13.43 | 90       | 90      | 90       |
| Zn-3Mo/HZ-5 | 20.12           | 19.93 | 13.41 | 90       | 90      | 90       |
| Zn-5Mo/HZ-5 | 20.13           | 19.92 | 13.40 | 90       | 90      | 90       |

**Table S2.** Acidity determined by NH<sub>3</sub>-TPD

| Catalyst    | WAS   |                    | SAS   |                    | Total              |
|-------------|-------|--------------------|-------|--------------------|--------------------|
|             | T(°C) | amount<br>(mmol/g) | T(°C) | amount<br>(mmol/g) | amount<br>(mmol/g) |
|             | HZ-5  | 198                | 0.452 | 423                | 0.280              |
| Zn/HZ-5     | 197   | 0.436              | 413   | 0.078              | 0.514              |
| Zn-1Mo/HZ-5 | 208   | 0.474              | 410   | 0.048              | 0.522              |
| Zn-3Mo/HZ-5 | 196   | 0.495              | 402   | 0.037              | 0.532              |
| Zn-5Mo/HZ-5 | 195   | 0.545              | 415   | 0.010              | 0.555              |

**Table S3** Textural properties of the spent HZ-5, spent Zn/HZ-5 and spent Zn-3Mo/HZ-5.

| Sample                   | $S_{\text{BET}}^{[a]}$<br>(m <sup>2</sup> /g) | $S_{\text{mic}}$<br>(m <sup>2</sup> /g) | $S_{\text{ext}}^{[b]}$<br>(m <sup>2</sup> /g) | $V_{\text{total}}$<br>(cm <sup>3</sup> /g) | $V_{\text{mic}}$<br>(cm <sup>3</sup> /g) | $V_{\text{meso}}^{[c]}$<br>(cm <sup>3</sup> /g) |
|--------------------------|-----------------------------------------------|-----------------------------------------|-----------------------------------------------|--------------------------------------------|------------------------------------------|-------------------------------------------------|
| spent HZ-5               | 296.1                                         | 255.5                                   | 40.6                                          | 0.19                                       | 0.11                                     | 0.08                                            |
| spent Zn/HZ-5            | 247.7                                         | 220.9                                   | 26.8                                          | 0.14                                       | 0.10                                     | 0.04                                            |
| spent Zn-3Mo/HZ-5 (10h)  | 218.2                                         | 187.3                                   | 30.9                                          | 0.16                                       | 0.08                                     | 0.08                                            |
| spent Zn-3Mo /HZ-5 (24h) | 138.4                                         | 116.4                                   | 21.7                                          | 0.12                                       | 0.05                                     | 0.07                                            |

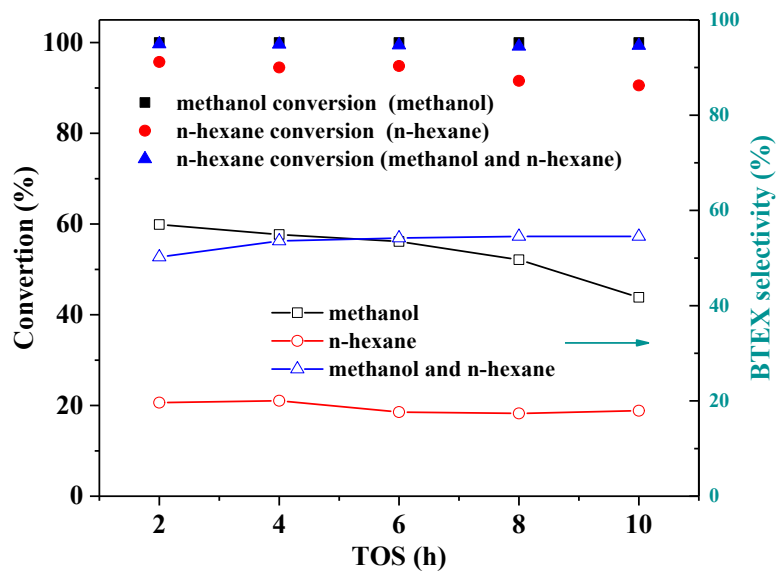

**Fig. S1** Conversion and BTEX selectivity for different feedstocks. Reaction conditions: T=470 °C, WHSV=1.0 h<sup>-1</sup>, TOS=2 h)

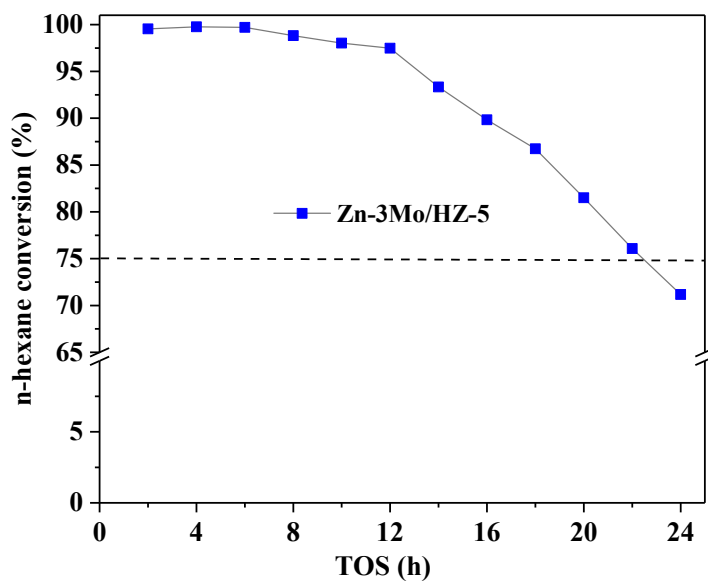

**Fig. S2.** n-hexane conversion over Zn-3Mo/HZ-5 catalyst. Reaction conditions: methanol/n-hexane = 7:3, T = 470 °C, and WHSV = 1.0 h<sup>-1</sup>.
